# Supplementary material for: N-lauryltyramine capped copper nanoparticles exhibit a selective colorimetric response towards hazardous mercury(ii) ions and display true anti-biofilm and efflux pump inhibitory effects in E. coli
Source: Royal Society of Chemistry journal article supplement (doi:10.1039/c6ra16912k), 2016-01-01
Supplement: c6ra16912k1.pdf [file c6ra16912k1.pdf]

*Supporting information*

Table S1: NLTA-CuNPs upon prolonged treatment causes impairment in cell membrane integrity.

| Treatments | Absorbance at different time intervals |        |        |        |
|------------|----------------------------------------|--------|--------|--------|
|            | 0 h                                    |        | 3 h    |        |
|            | 260 nm                                 | 280 nm | 260 nm | 280 nm |
| NLTA-CuNPs | 0.208                                  | 0.166  | 0.903  | 0.649  |
| Triton X   | 3.146                                  | 2.821  | 3.355  | 2.963  |
| Untreated  | 0.173                                  | 0.146  | 0.486  | 0.349  |

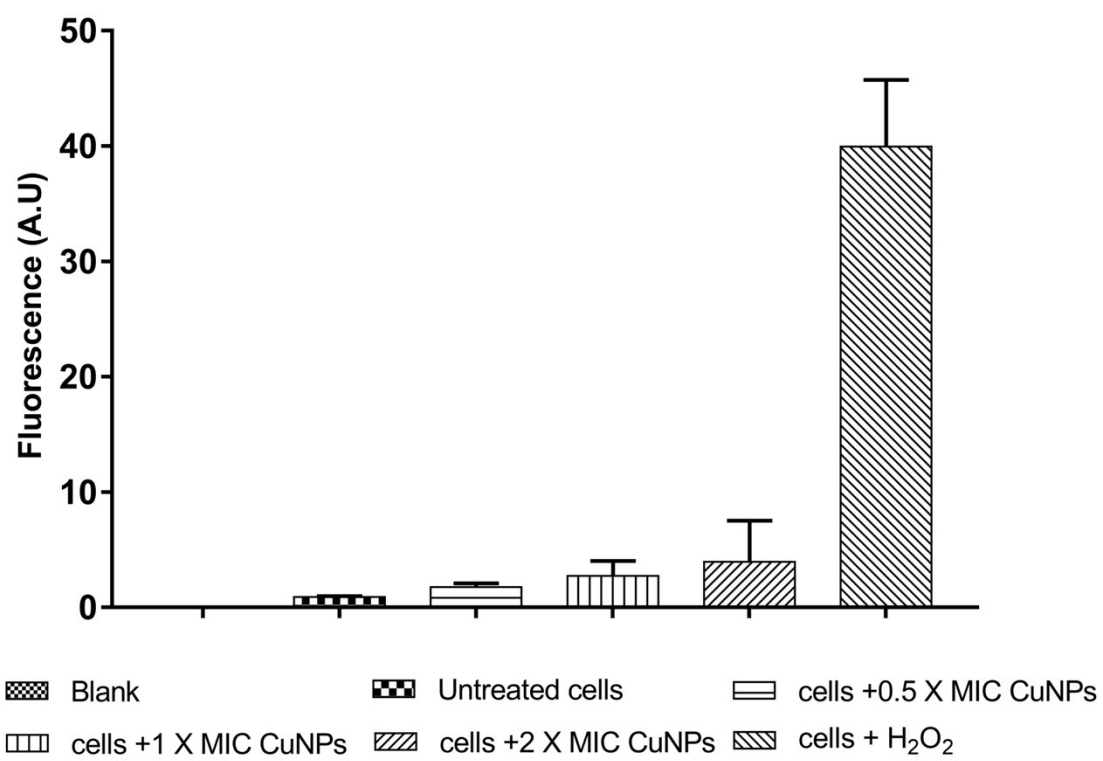

Fig S1: NLTA-CuNPs could not induce oxidative damage in *E.coli*

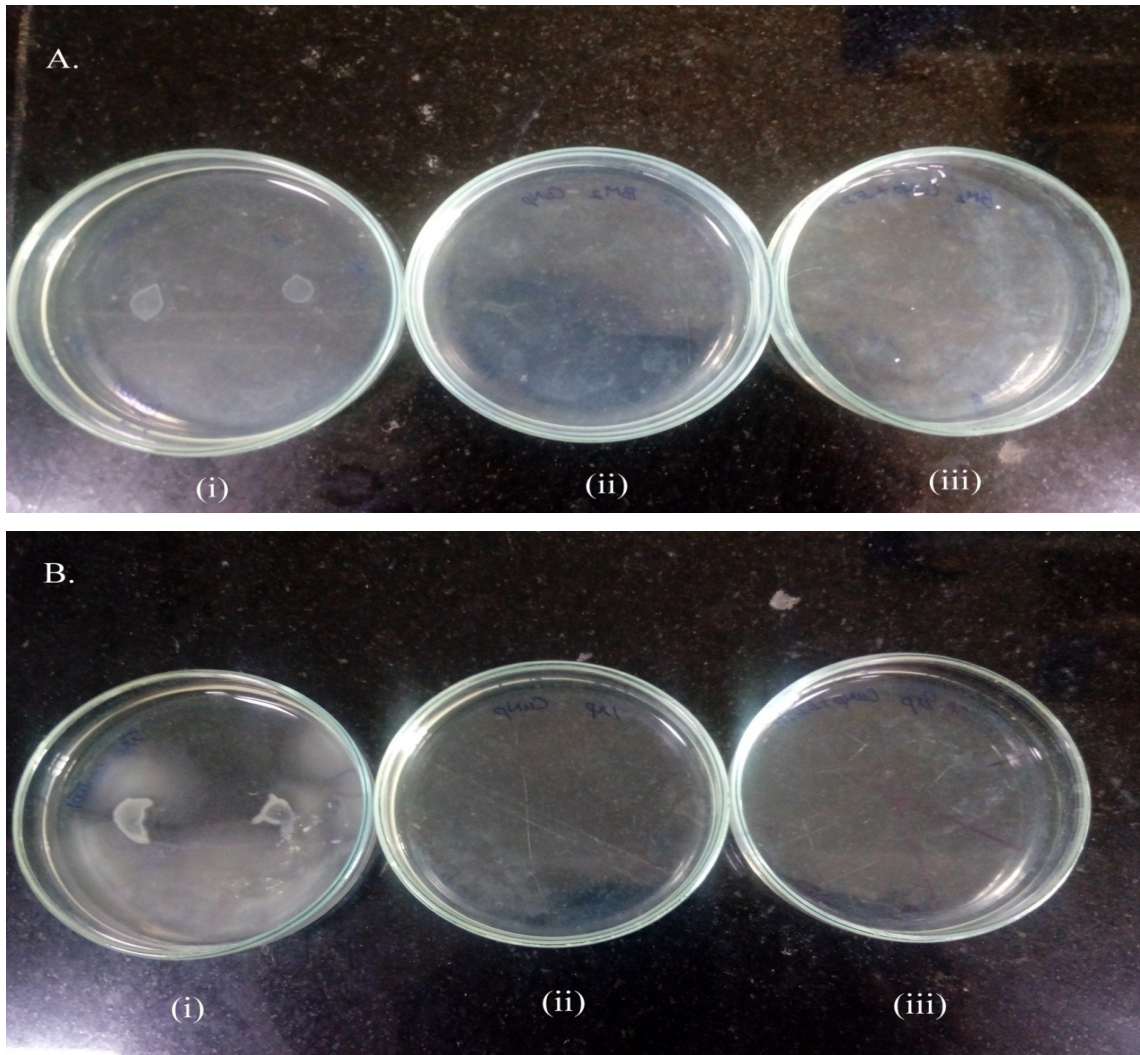

Fig. S2. Swimming motility was evaluated on tryptone plates containing 0.3 % agar and swarming motility was assessed on modified BM2 glucose plates containing 0.5 % agar. Plates were incubated for 18 -24h photographs were taken and either halo diameter for swimming or swarm area was assessed i) Untreated ii) NLTA- CuNPs iii) NLTA- CuNPs + EDTA

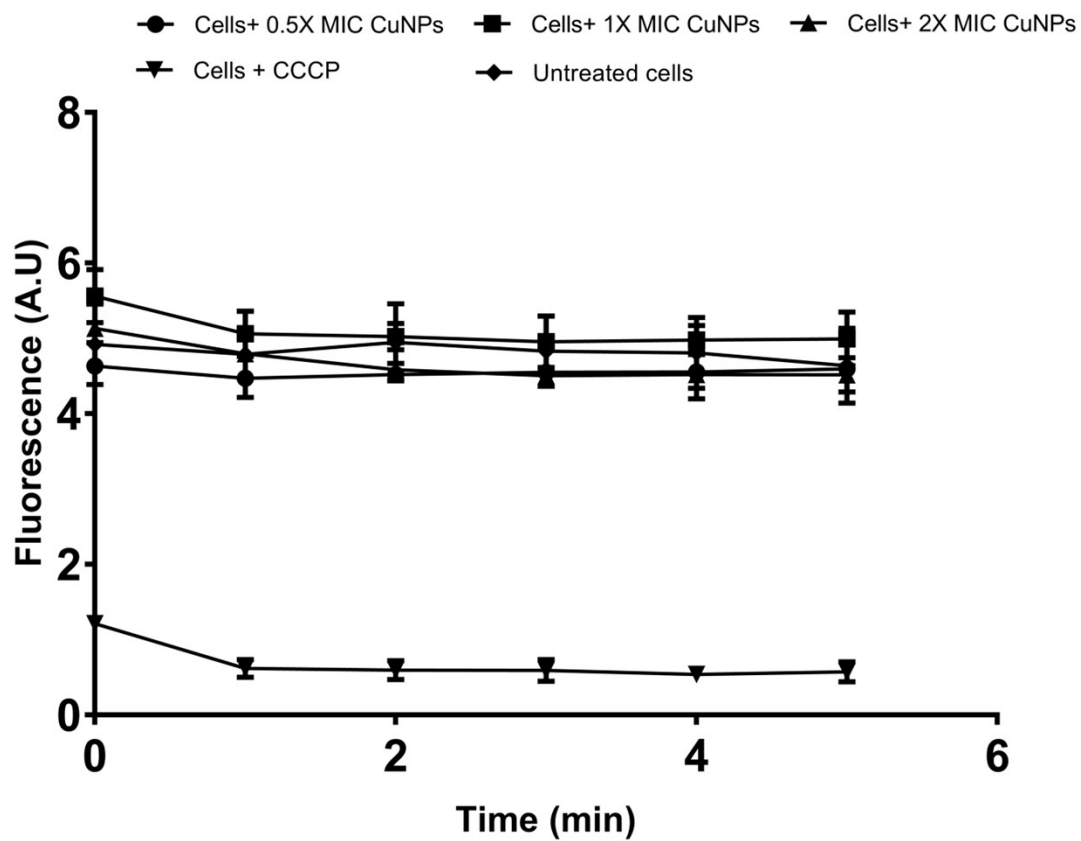

Fig. S3: NLTA-CuNPs does not perturb membrane potential in *E. coli*

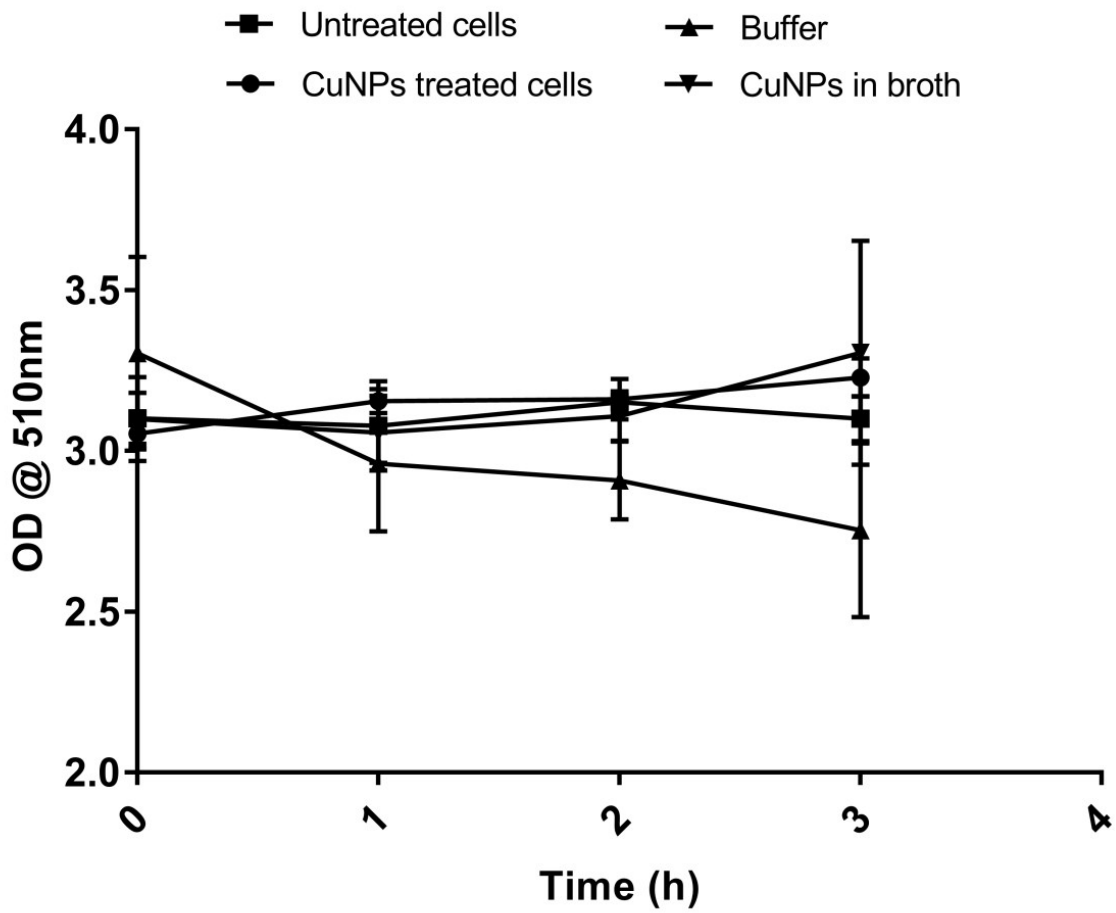

Fig.S4: Alizarin red conjugation test showing that no significant release of Cu (II) ions from NLTA- CuNPs.

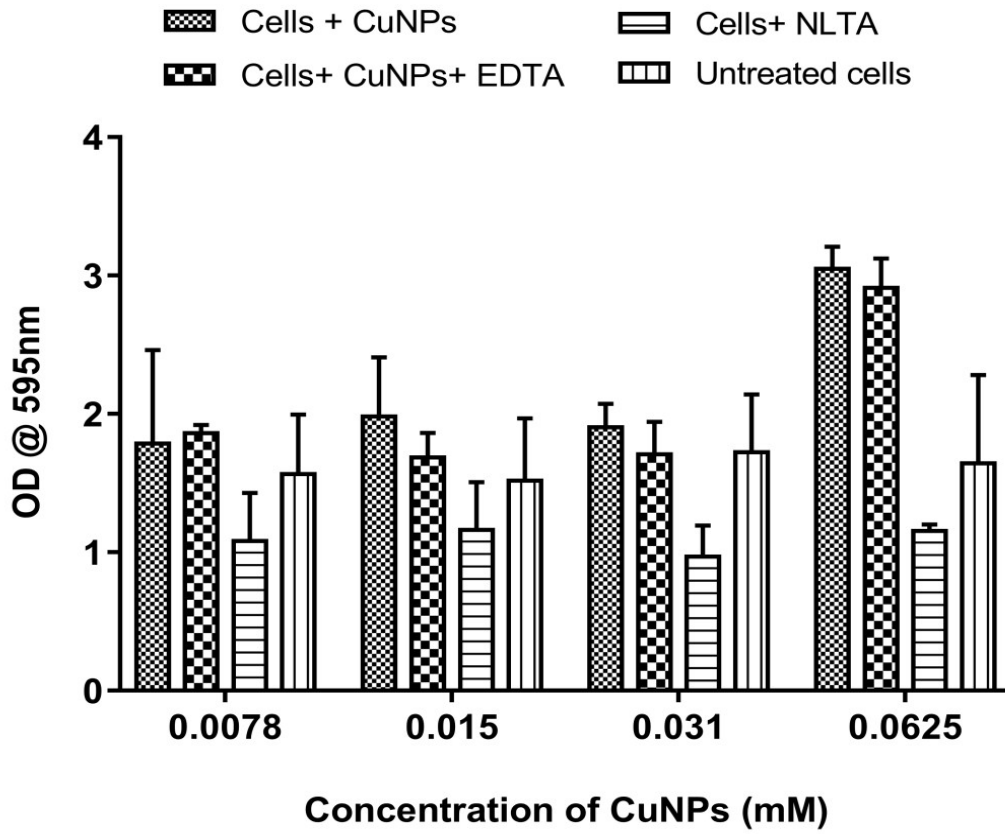

Fig. S5: NLTA-CuNPs induces respiratory burst at higher concentrations
